# Supplementary material for: Withaferin A inhibits Epithelial to Mesenchymal Transition in Non-Small Cell Lung Cancer Cells
Source: PubMed Central journal article supplement (PMC6200817; doi:10.1038/s41598-018-34018-1), 2018-10-24
Supplement: 41598_2018_34018_MOESM1_ESM.pdf [file 41598_2018_34018_MOESM1_ESM.pdf]

# Supplementary Materials

## Title:

Withaferin A inhibits Epithelial to Mesenchymal Transition in Non-Small Cell Lung Cancer Cells

## **Author list and affiliation:**

Al-Hassan Kyakulaga<sup>1</sup>, Farrukh Aqil<sup>2, 3</sup>, Radha Munagala<sup>2, 3</sup>, and Ramesh C. Gupta<sup>1,3,\*</sup>

<sup>1</sup>Department of Pharmacology and Toxicology, <sup>2</sup>Department of Medicine, <sup>3</sup>James Graham Brown Cancer Center, University of Louisville, Louisville, KY 40202

## **\*Corresponding author:**

Ramesh C. Gupta, Delia Baxter II, Room 304E, University of Louisville, 580 S. Preston Street, Louisville, KY 40202. Email: [rcgupta@louisville.edu](mailto:rcgupta@louisville.edu); Tel: 502 852 3682, Fax: 502 852 3842

A549 Cells

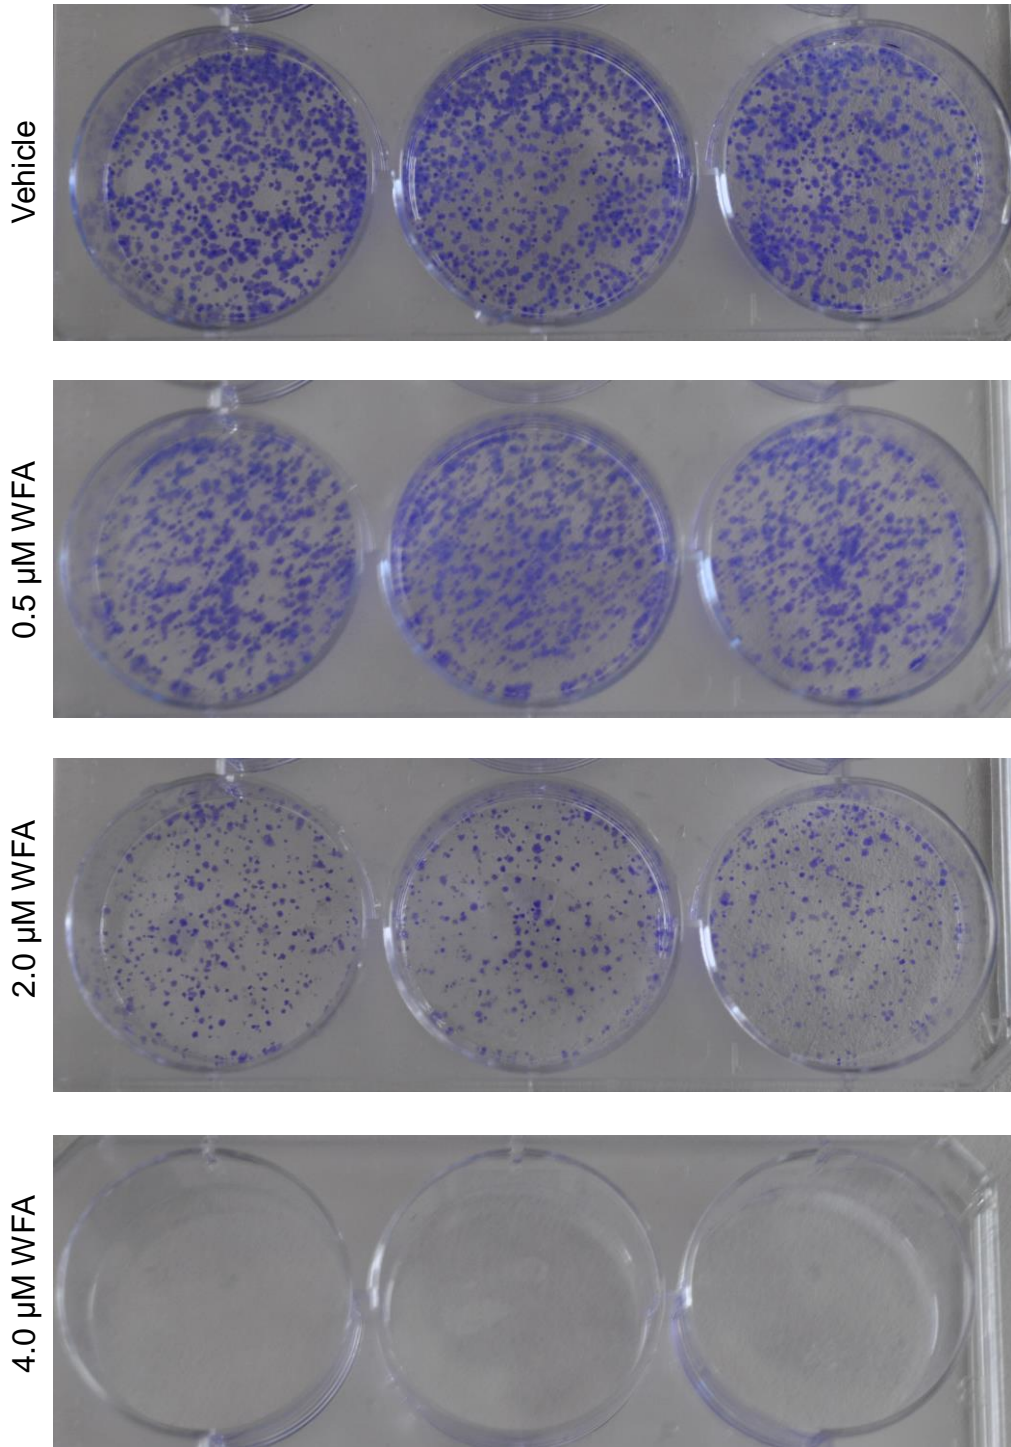

**Supplementary Figure S1.** Unedited images showing dose-dependent inhibition of colony formation in A549 cells related to Figure 1F. Cells were incubated with WFA (0-4  $\mu\text{M}$ ) in triplicates for 24 h and then incubated in fresh media for an additional 10 days. Colonies were stained 0.5% crystal violet.

### H1299 Cells

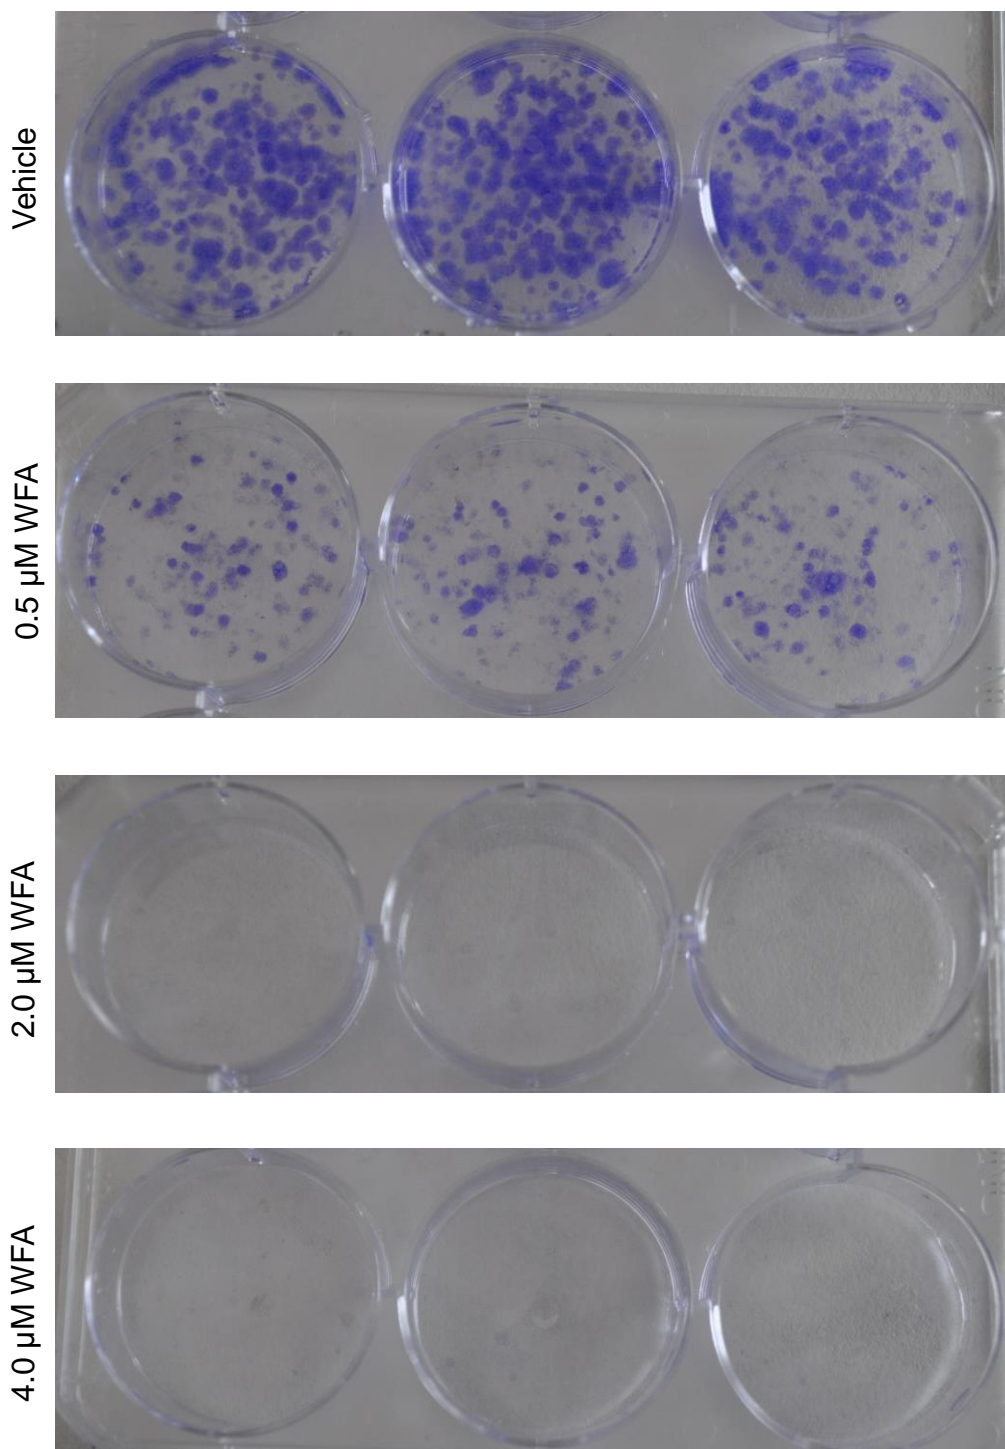

**Supplementary Figure S2.** Unedited images showing dose-dependent inhibition of colony formation in H1299 cells related to Figure 1F. Cells were incubated with WFA (0-4  $\mu\text{M}$ ) in triplicates for 24 h and then incubated in fresh media for an additional 10 days. Colonies were stained 0.5% crystal violet.

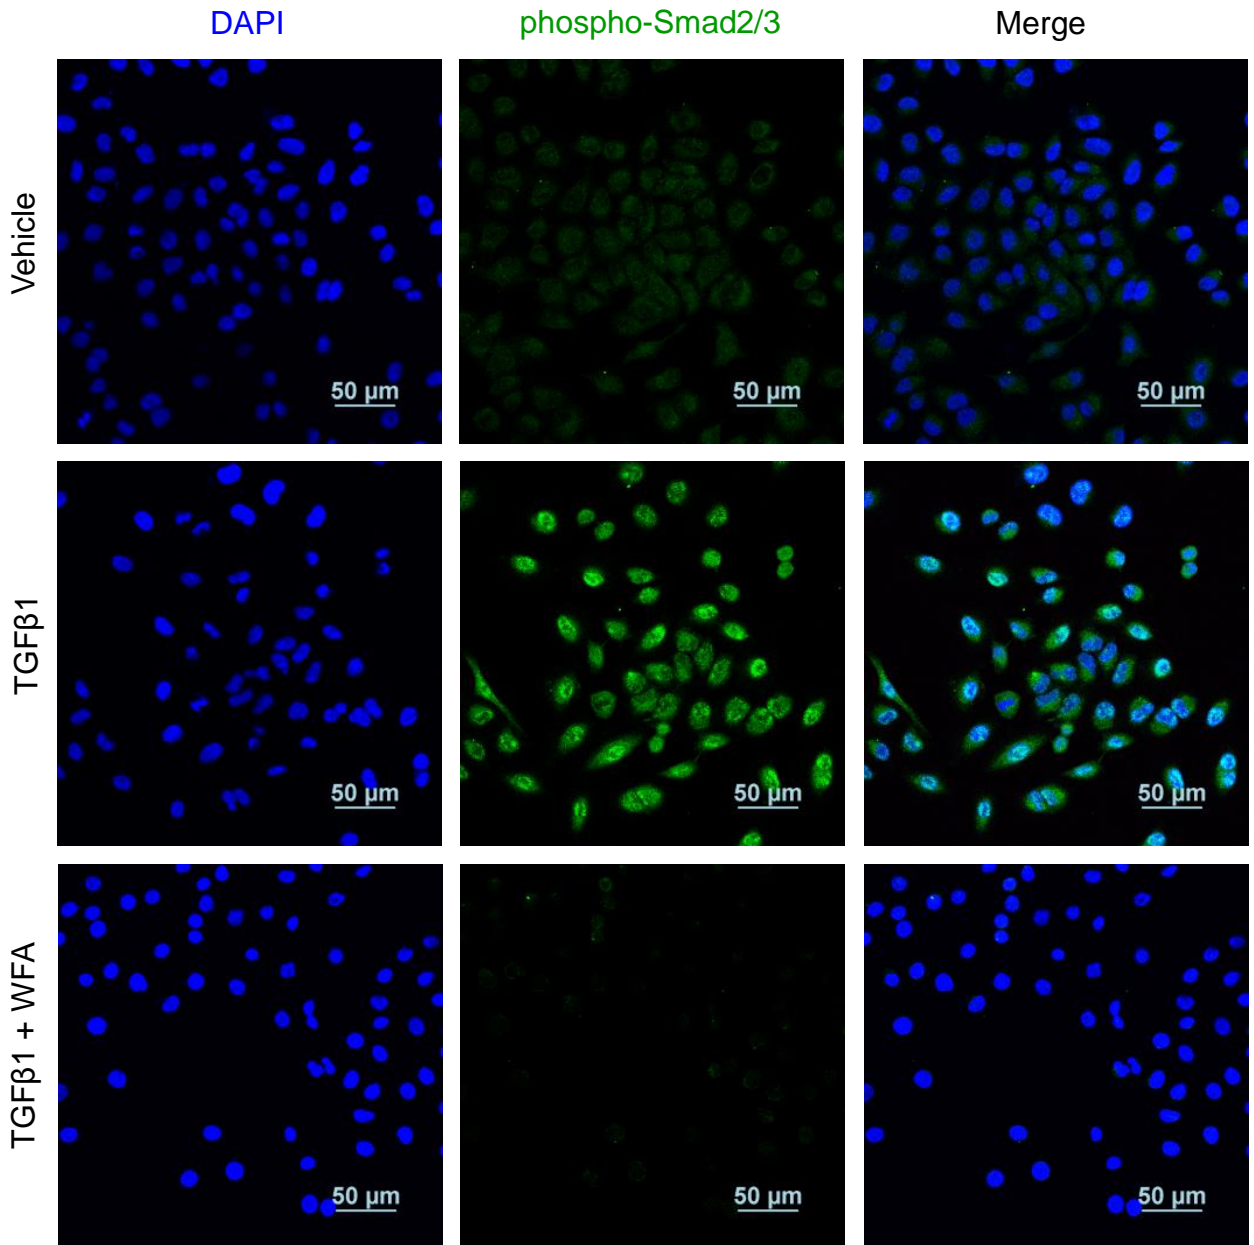

**Supplementary Figure S3.** Representative confocal images of A549 cells stimulated with TGFβ1 for 1 h depicting the phosphorylation and nuclear translocation of Smad2/3. The images show cells probed for phospho-Smad2/3 (green) nuclei (blue). Incubation of cells with WFA (0.5μM) decreased both the phosphorylation and nuclear translocation of Smad2/3 in A549 cells.



# Whole cell lysates

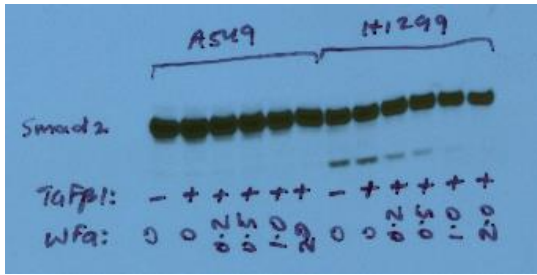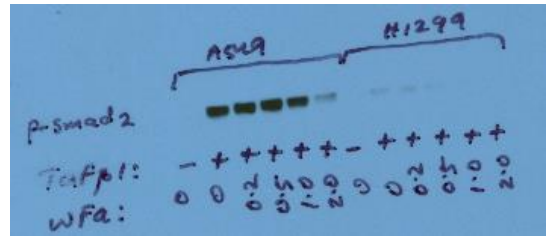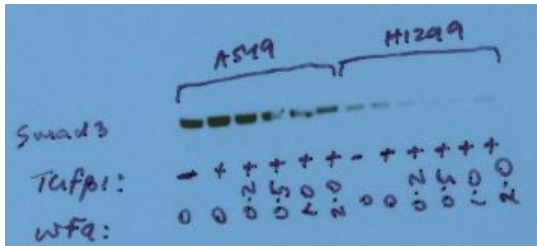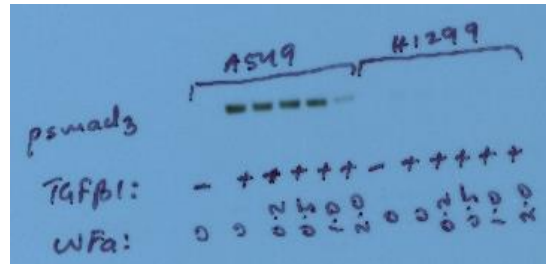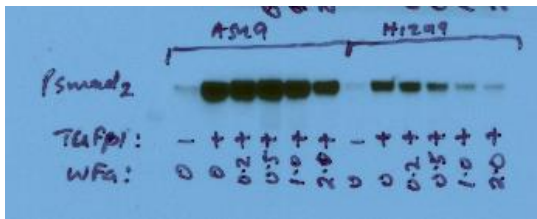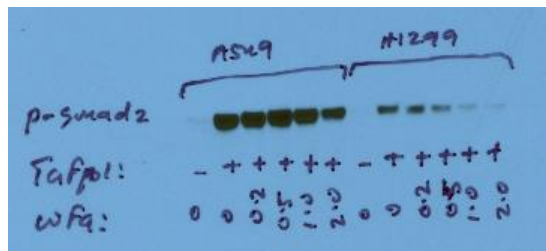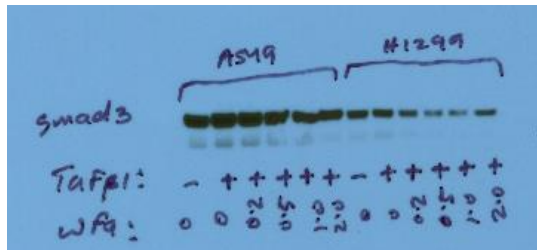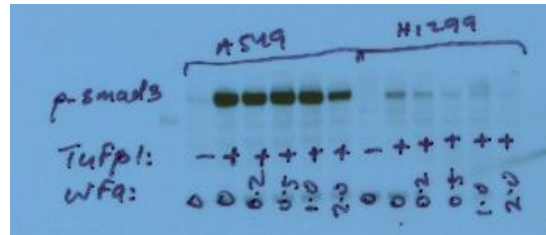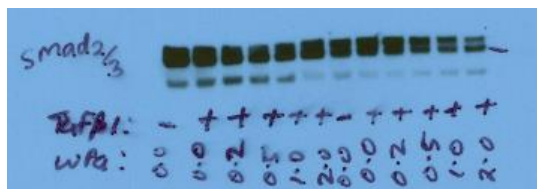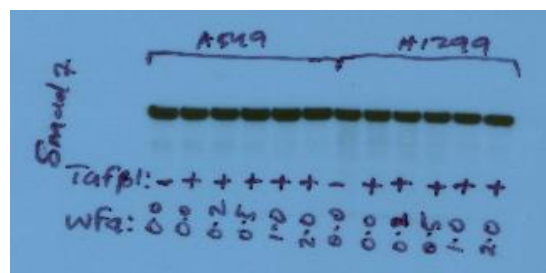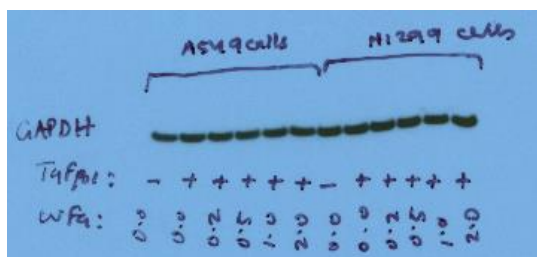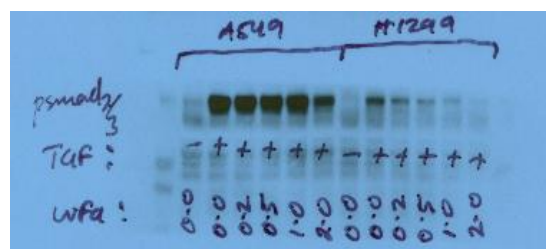

**Supplementary Figure S4.** Full-length unedited images of gels related to Figure 5B. Most or all the data in this supplementary figure are part of Figure 5B.

## Nuclear lysates

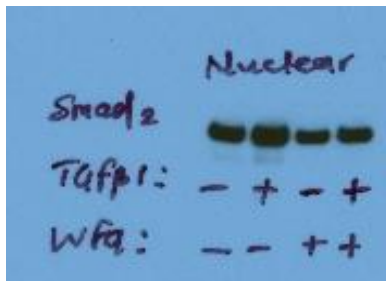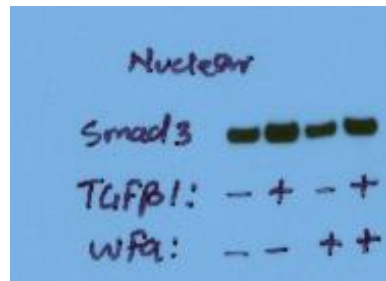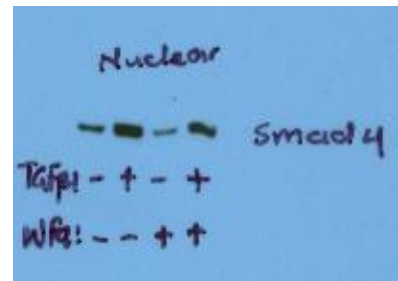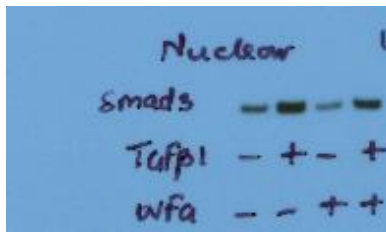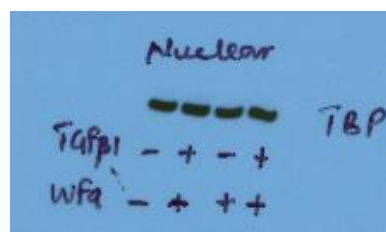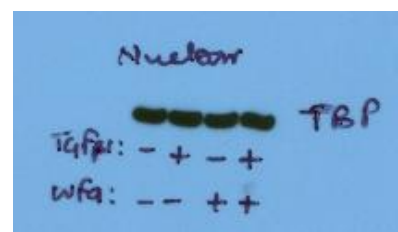

## Cytosolic Fractions

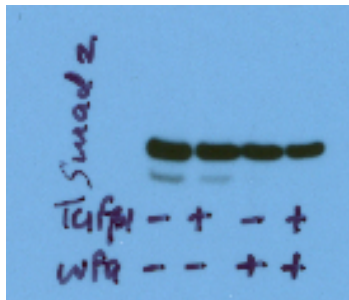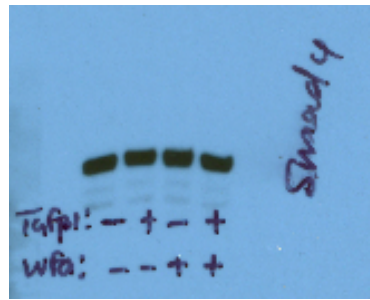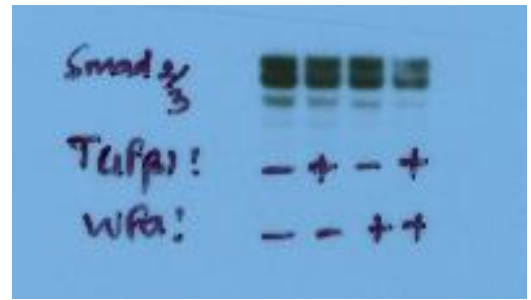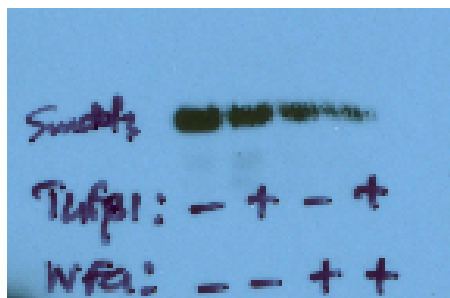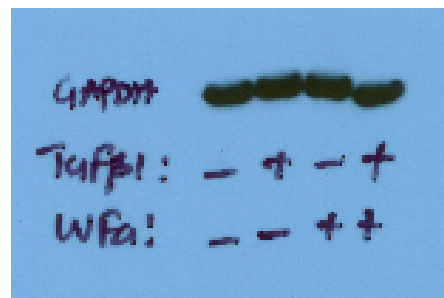

**Supplementary Figure S5.** Full-length unedited images of gels related to Figure 5C. Most or all the data in this supplementary figure are part of Figure 5C.

### Whole cell lysate

### Cytosolic lysate

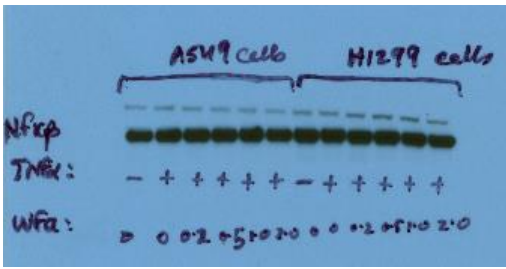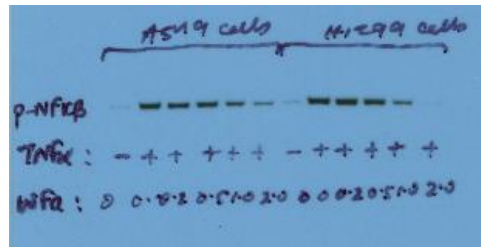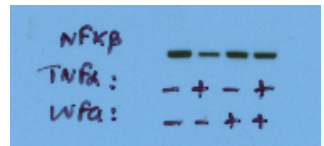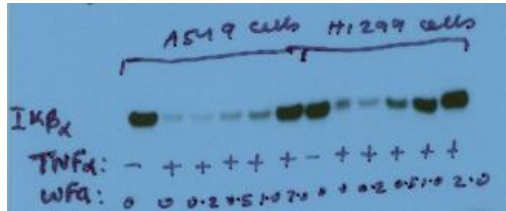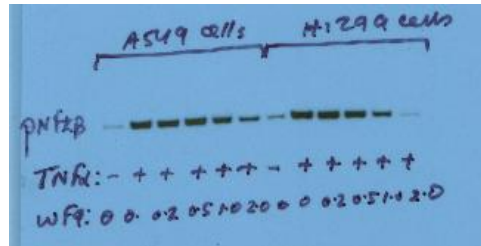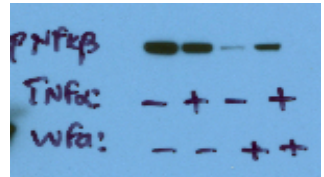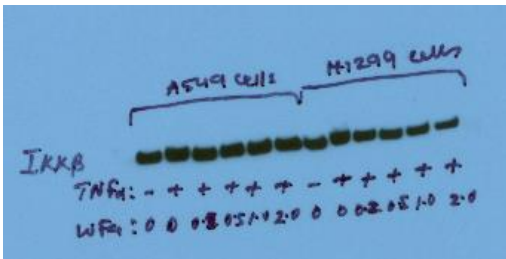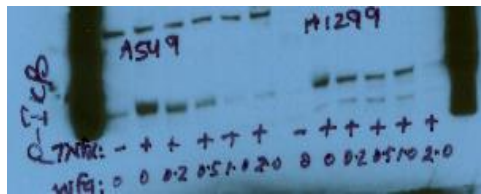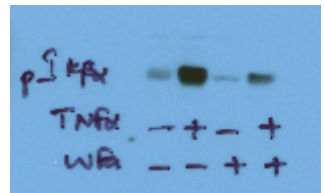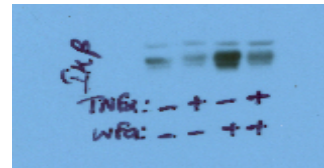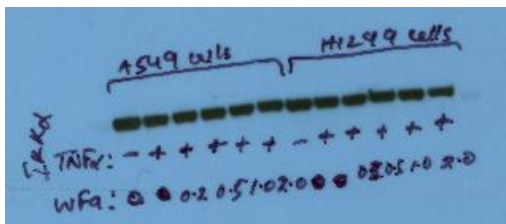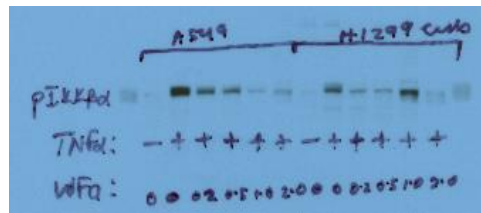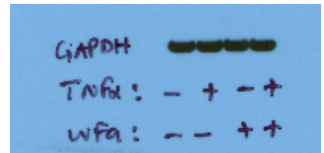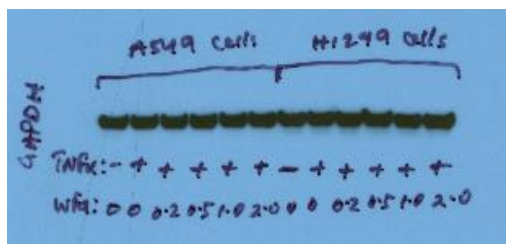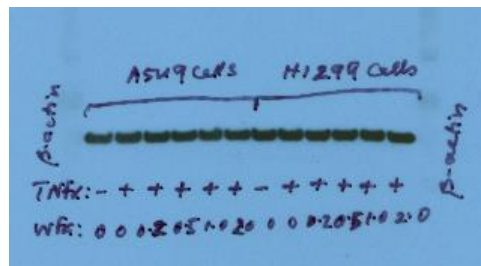

### Nuclear lysate

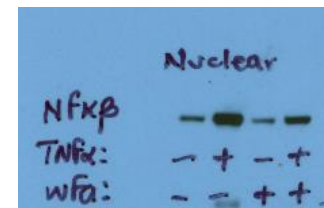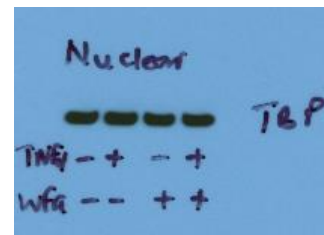

**Supplementary Figure S6.** Full-length unedited images of gels related to Figure 6B-C. Most or all the data in this supplementary figure are part of Figure 6B-C.



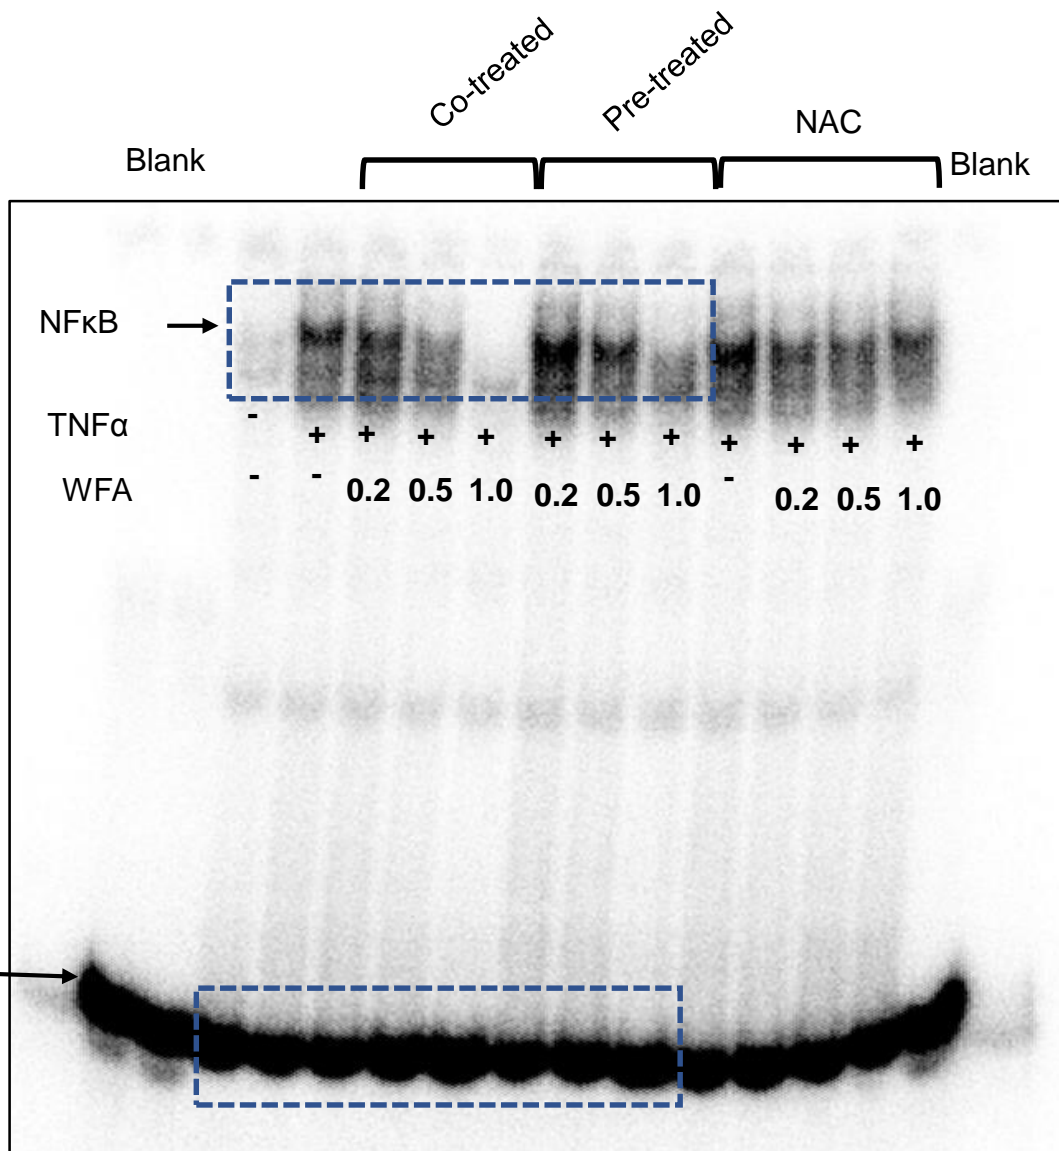

**Supplementary Figure S7** Full-length unedited image of EMSA gels related to Figure 6D. The cropped image is indicated in the blue dotted area. A549 cells were either pre-treated or co-treated with indicated concentrations of WFA and stimulated with 25 ng/mL TNF $\alpha$  in serum-free media for 30 minutes. Additionally, cells were co-treated with WFA and TNF $\alpha$  in the presence of N-Acetyl Cysteine (NAC). The cells were collected by trypsinization, nuclear lysates were prepared and the DNA binding capability of NF- $\kappa$ B was assessed by EMSA.



**Supplementary Table S1a.** Band intensity Figure 3A: A549 cells (Normalized to GAPDH)

| <b>Bands</b> | <b>1</b> | <b>2</b> | <b>3</b> | <b>4</b> | <b>5</b> |
|--------------|----------|----------|----------|----------|----------|
| E-cadherin   | 1        | 0.2      | 0.4      | 0.01     | 0.8      |
| N-cadherin   | 1        | 4        | 3        | 6        | 1.5      |
| Snail        | 1        | 8        | 1.1      | 7.9      | 0.8      |
| Vimentin     | 1        | 1.8      | 0.8      | 1.1      | 0.5      |
| Fibronectin  | 1        | 1.5      | 0.2      | 5        | 1.3      |
| Claudin-1    | 1        | 0.1      | 1.8      | 1.5      | 0.4      |

**Supplementary Table S1b.** Band intensity Figure 3A: H1299 cells (Normalized to GAPDH)

| <b>Bands</b> | <b>1</b> | <b>2</b> | <b>3</b> | <b>4</b> | <b>5</b> |
|--------------|----------|----------|----------|----------|----------|
| E-cadherin   |          |          |          |          |          |
| N-cadherin   | 1        | 1.5      | 1.1      | 2.1      | 1.4      |
| Snail        | 1        | 4.2      | 2        | 3.8      | 0.7      |
| Vimentin     | 1        | 1.2      | 0.9      | 0.85     | 0.81     |
| Fibronectin  |          |          |          |          |          |
| Claudin-1    | 1        | 0.4      | 10       | 8.46     | 3.2      |

**Supplementary Table S1c.** qRT-PCR Mean CT values – Related to Figure 3B

| <b>Group</b>                    | <b>GAPDH Mean CT</b> | <b>Beta actin Mean CT value</b> |
|---------------------------------|----------------------|---------------------------------|
| Vehicle                         | 16.48203087          | 15.72822571                     |
| TGF $\beta$                     | 16.50045204          | 15.76068783                     |
| TNF $\alpha$                    | 16.6547184           | 15.14597702                     |
| TGF $\beta$ 1 + TNF $\alpha$    | 16.04142189          | 15.51629162                     |
| TGF $\beta$ 1+TNF $\alpha$ +WFA | 16.83882713          | 15.41293335                     |

**Supplementary Table S2a:** Relative Band intensity Figure 5A: A549 cells  
(Normalized to GAPDH)

| <b>Bands</b> | <b>1</b> | <b>2</b> | <b>3</b> | <b>4</b> | <b>5</b> | <b>6</b> |
|--------------|----------|----------|----------|----------|----------|----------|
| Smad2        | 1        | 1.2      | 1.1      | 1.1      | 1.01     | 0.98     |
| p-Smad2      | 1        | 21       | 21.1     | 17.8     | 16.3     | 5.4      |
| Smad3        | 1        | 1.3      | 1.1      | 1.1      | 0.94     | 0.81     |
| p-Smad3      | 1        | 15.3     | 10.8     | 11.1     | 9.75     | 3.2      |
| Smad2/3      | 1        | 0.97     | 0.91     | 0.8      | 0.9      | 1.12     |
| P-Smad2/3    | 1        | 21       | 19.2     | 19.7     | 17.9     | 5.6      |
| Smad7        | 1        | 0.94     | 0.98     | 1.1      | 1.03     | 0.98     |

**Supplementary Table S2b:** Relative Band intensity Figure 5A: H1299 cells  
(Normalized to GAPDH)

| <b>Bands</b> | <b>1</b> | <b>2</b> | <b>3</b> | <b>4</b> | <b>5</b> | <b>6</b> |
|--------------|----------|----------|----------|----------|----------|----------|
| Smad2        | 1        | 1.01     | 1.1      | 1.02     | 1.01     | 0.98     |
| p-Smad2      | 1        | 10       | 9.5      | 3.8      | 1.8      | 0.9      |
| Smad3        | 1        | 0.97     | 0.81     | 0.53     | 0.44     | 0.6      |
| p-Smad3      | 1        | 8.1      | 6.2      | 3.01     | 4        | 1.97     |
| Smad2/3      | 1        | 1.3      | 1.1      | 0.94     | 0.74     | 0.61     |
| P-Smad2/3    | 1        | 5.4      | 3.02     | 1.78     | 1.1      | 0.76     |
| Smad7        | 1        | 1.1      | 0.98     | 1.1      | 1.01     | 1.02     |

**Supplementary Table S2c:** Relative band intensity in Figure 5B –  
Nuclear lysate (Normalized to TBP)

| <b>Bands</b> | <b>1</b> | <b>2</b> | <b>3</b> | <b>4</b> |
|--------------|----------|----------|----------|----------|
| Smad2        | 1        | 2.1      | 0.7      | 0.9      |
| Smad3        | 1        | 3        | 0.61     | 1.3      |
| Smad4        | 1        | 2.3      | 0.53     | 1.75     |

**Supplementary Table S2d:** Relative band intensity in Figure 5C –  
Cytosolic lysate (Normalized to GAPDH)

| <b>Bands</b> | <b>1</b> | <b>2</b> | <b>3</b> | <b>4</b> |
|--------------|----------|----------|----------|----------|
| Smad2        | 1        | 1.01     | 0.92     | 0.84     |
| Smad3        | 1        | 0.8      | 0.61     | 0.41     |
| Smad4        | 1        | 0.81     | 0.98     | 0.9      |

**Table S3a:** Relative Band intensity Figure 6A: A549 cells (Normalized to GAPDH)

| <b>Bands</b>            | <b>1</b> | <b>2</b> | <b>3</b> | <b>4</b> | <b>5</b> | <b>6</b> |
|-------------------------|----------|----------|----------|----------|----------|----------|
| NF- $\kappa$ B          | 1        | 1.1      | 1.3      | 1.01     | 1.13     | 1.01     |
| p-NF- $\kappa$ B        | 1        | 6.11     | 5.1      | 4.03     | 3.2      | 1.5      |
| I $\kappa$ B $\alpha$   | 1        | 0.01     | 0.012    | 0.24     | 0.46     | 1.12     |
| p-I $\kappa$ B $\alpha$ | 1        | 10.1     | 4.01     | 1.8      | 0.72     | 0.81     |
| IKK $\beta$             | 1        | 0.987    | 1.01     | 1.1      | 0.99     | 0.94     |
| IKK $\alpha$            | 1        | 1.2      | 1.01     | 1.1      | 1.3      | 1.01     |
| p-IKK $\alpha/\beta$    | 1        | 9.4      | 4.6      | 2.6      | 1.74     | 1.1      |

**Table S3b:** Relative Band intensity Figure 6A: H1299 cells (Normalized to GAPDH)

| <b>Bands</b>            | <b>1</b> | <b>2</b> | <b>3</b> | <b>4</b> | <b>5</b> | <b>6</b> |
|-------------------------|----------|----------|----------|----------|----------|----------|
| NF- $\kappa$ B          | 1        | 0.99     | 1.01     | 1.1      | 1        | 0.98     |
| p-NF- $\kappa$ B        | 1        | 6.3      | 5.6      | 3.2      | 2.01     | 1.1      |
| I $\kappa$ B $\alpha$   | 1        | 0.1      | 0.2      | 0.31     | 0.61     | 1.1      |
| p-I $\kappa$ B $\alpha$ | 1        | 5        | 3.1      | 2        | 1.8      | 1.1      |
| IKK $\beta$             | 1        | 0.98     | 0.95     | 1.1      | 1.1      | 0.95     |
| IKK $\alpha$            | 1        | 0.98     | 0.943    | 0.87     | 0.79     | 0.81     |
| p-IKK $\alpha/\beta$    | 1        | 4        | 2.3      | 2.01     | 3.98     | 1.12     |

**Table S3c:** Relative band intensity in Figure 6B - Nuclear lysate (Normalized to TBP)

| <b>Bands</b>   | <b>1</b> | <b>2</b> | <b>3</b> | <b>4</b> |
|----------------|----------|----------|----------|----------|
| NF- $\kappa$ B | 1        | 5.6      | 0.91     | 1.81     |

**Table S3d:** Relative band intensity in Figure 6B – Cytosolic lysate (Normalized to GAPDH)

| <b>Bands</b>            | <b>1</b> | <b>2</b> | <b>3</b> | <b>4</b> |
|-------------------------|----------|----------|----------|----------|
| NF- $\kappa$ B          | 1        | 0.48     | 0.87     | 0.777    |
| p-NF- $\kappa$ B        | 1        | 0.78     | 0.01     | 0.38     |
| I $\kappa$ B $\alpha$   | 1        | 0.71     | 7.1      | 5.12     |
| p-I $\kappa$ B $\alpha$ | 1        | 8.2      | 0.41     | 1.42     |

**Supplemental Table S4.** List of antibodies used for western blot analysis

| <b>Antibody</b>  | <b>Company</b> | <b>Product Number</b> | <b>MW</b> | <b>Dilution</b> | <b>Host</b> |
|------------------|----------------|-----------------------|-----------|-----------------|-------------|
| Smad2            | Cell Signaling | 5539                  | 60 KDa    | 1:1000          | Rabbit      |
| Smad3            | Cell Signaling | 9523                  | 52 KDa    | 1:1000          | Rabbit      |
| Smad4            | Cell Signaling | 38454                 | 70 KDa    | 1:1000          | Rabbit      |
| Smad7            | Santa Cruz     | Sc-365845             | 46 KDa    | 1:1000          | Mouse       |
| Smad2/3          | Cell Signaling | 8685                  | 52-60 KDa | 1:1000          | Rabbit      |
| Phospho-Smad2    | Cell Signaling | 3108                  | 60 KDa    | 1:1000          | Rabbit      |
| Phospho-Smad3    | Cell Signaling | 9520                  | 52 KDa    | 1:1000          | Rabbit      |
| Phospho-Smad2/3  | Cell Signaling | 9510                  | 52-60 KDa | 1:1000          | Rabbit      |
| NFκB P65         | Cell Signaling | 8242                  | 65 KDa    | 1:1000          | Rabbit      |
| IκBα             | Cell Signaling | 4814                  | 39 KDa    | 1:1000          | Mouse       |
| IKKβ             | Cell Signaling | 8943                  | 87 KDa    | 1:1000          | Rabbit      |
| IKKα             | Cell Signaling | 11930                 | 85 KDa    | 1:1000          | Rabbit      |
| Phospho-NFκB P65 | Cell Signaling | 3033                  | 65 KDa    | 1:1000          | Rabbit      |
| Phospho-IκBα     | Cell Signaling | 2859                  | 40 KDa    | 1:1000          | Rabbit      |
| Phospho-IKKα/β   | Cell Signaling | 2697                  | 85-87 KDa | 1:1000          | Rabbit      |
| E-cadherin       | Cell Signaling | 3195                  | 135 KDa   | 1:1000          | Rabbit      |
| Vimentin         | Cell Signaling | 5741                  | 57 KDa    | 1:1000          | Rabbit      |
| Snail            | Cell Signaling | 3879                  | 29 KDa    | 1:1000          | Rabbit      |
| N-cadherin       | Cell Signaling | 13116                 | 140 KDa   | 1:1000          | Rabbit      |
| Claudin-1        | Cell Signaling | 13255                 | 20 KDa    | 1:1000          | Rabbit      |
| Fibronectin      | Santa Cruz     | Sc-18825              | 220 KDa   | 1:1000          | Mouse       |
| GAPDH            | Cell Signaling | 5174                  | 37 KDa    | 1:1000          | Rabbit      |
| Beta actin       | Sigma          | A3854                 | 42 KDa    | 1:3000          | Mouse       |
| TBP              | Millipore      | MAB3658               | 42 KDa    | 1:1000          | Mouse       |
|                  |                |                       |           |                 |             |



**Supplemental Table S5.** List of primer sequence used for RT-PCR

| <b>Genes</b> | <b>Forward primer</b>      | <b>Reverse primer</b>       |
|--------------|----------------------------|-----------------------------|
| E-cadherin   | 5'-CCACCAAAGTCACGCTGAAT-3' | 5'-GGAGTTGGGAAATGTGAGC-3'   |
| Vimentin     | 5'-GAGAACTTTGCCGTTGAAGC-3' | 5'-CTCAATGTCAAGGGCCATCT-3'  |
| Snail        | 5'-CAGCGAGCTGCAGGACTCTA-3' | 5'-GTGGGATGGCTGCCAGC-3'     |
| Fibronectin  | 5'-GAGCTATTCCCTGCACCTGA-3' | 5'-CGTGCAAGGCAACCACACT-3'   |
| Beta-Actin   | 5'-CGTCATACTCCTGCTTGCTG-3' | 5'-GTACGCCAACACAGTGCT-3'    |
| GAPDH        | 5'-GACAGTCAGCCGCATCTTC-3'  | 5'-CAACAATATCCACTTTACCAG-3' |
